# Supplementary material for: Nature of nontargeted radiation effects observed during fractionated irradiation-induced thymic lymphomagenesis in mice
Source: PubMed Central journal article supplement — J Radiat Res. 2013 Jan 7;54(3):453–66. doi: 10.1093/jrr/rrs128 (PMC3650753; doi:10.1093/jrr/rrs128), 2013-01-07
Supplement: supp_rrs128_rrs128supp.pdf [file supp_rrs128_rrs128supp.pdf]

### Supplementary figure legends

**Supplementary Figure 1.** Induction of lagging chromatids or chromatid bridges at anaphase by H<sub>2</sub>O<sub>2</sub> in HCT116 cells. Asterisks indicate significant differences as compared to the control [t-test, P < 0.05 (\*), 0.01 (\*\*), and 0.001 (\*\*\*)]. A, Lagging chromatids at anaphase in a HCT116 cell 4 h after H<sub>2</sub>O<sub>2</sub> treatment. Bar, 10 μm. B, H<sub>2</sub>O<sub>2</sub>-induced aberrant anaphase cells with lagging chromosomes and/or chromosome bridges in HCT116 cells. Cells grown on a chamber slide were treated with H<sub>2</sub>O<sub>2</sub> for 30 min and grown for 4 to 6 h. C, Induction of aneuploidy by H<sub>2</sub>O<sub>2</sub> in HCT116 cells. Cells were treated with H<sub>2</sub>O<sub>2</sub> for 30 min and grown for two cell cycles. The background chromosome number is 45 in HCT116 cells. Therefore cells not containing 45 chromosomes are considered aneuploid cells.

**Supplementary Figure 2.** H<sub>2</sub>O<sub>2</sub>-induced chromosomal aberrations in thymocytes. Nonirradiated thymocytes (5 x 10<sup>6</sup> cells per dish) were cultured with the proliferation stimuli for 24 h at 37°C, treated with H<sub>2</sub>O<sub>2</sub> for 1 h, and then cultured with catalase for 31 h. Open circles denote individual mouse data. Closed circles with error bars denote the mean values ± standard deviations.

**Supplementary Figure 3.** Examples of karyotypic changes detected by chromosome painting in thymocytes and resultant thymic lymphomas. A, 10w-1 thymocyte painted with probes for chromosomes 8-14. Arrows indicate t(2;12). Chromosome 2 was not painted in this figure. B, The same translocation was observed in 10w-1-2 thymic lymphoma derived from 10w-1 thymocytes. In A and B, cells possessed trisomy 15, but chromosome 15 was not painted in these figures. C, 10w-7 thymocyte painted with probes for chromosomes 15-Y. Arrow indicates isochromosome 15. D, The same isochromosome 15 was detected in 10w-7-1 thymic lymphoma derived from 10w-7 thymocytes. In C and D, cells also bore t(1;12), but t(1;12) was not detected in these figures.

A

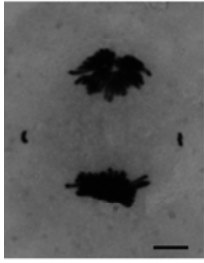

B

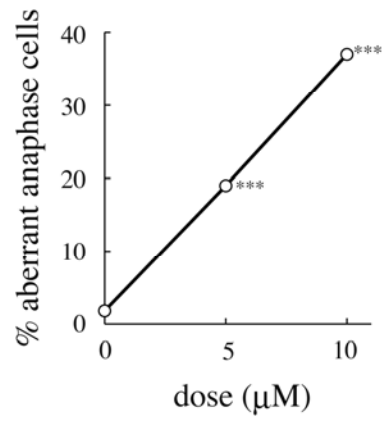

C

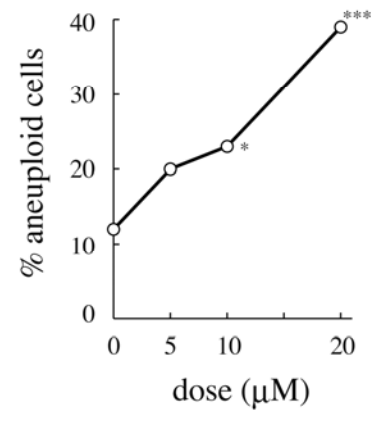

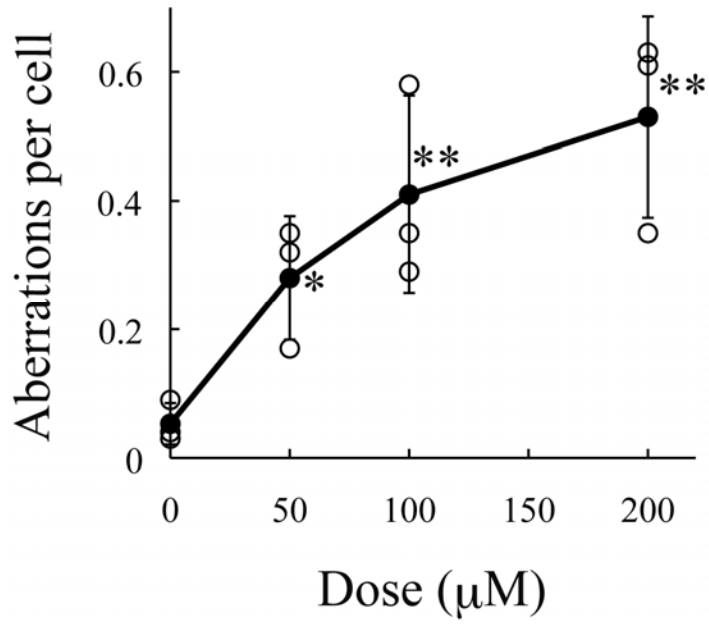

10w-1 thymocyte  
41, +15, t(2;12)

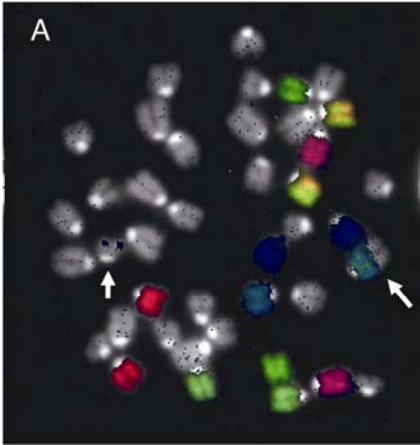

10w-7 thymocyte  
40, i(15), t(1;12)

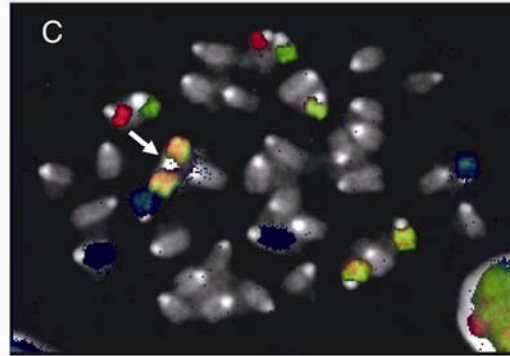

10w-1-2 thymic lymphoma

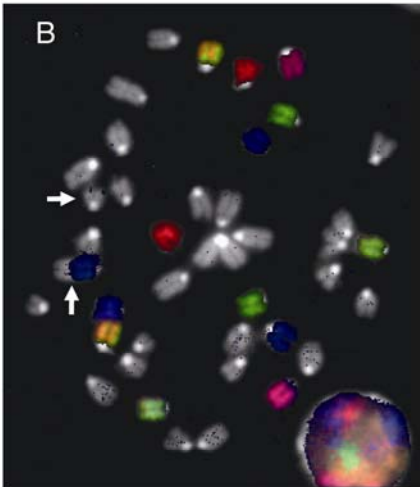

10w-7-1 thymic lymphoma

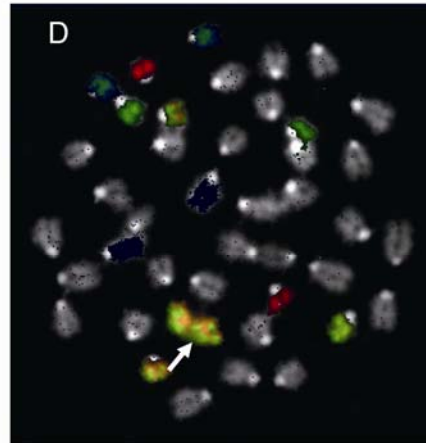

probe: chromosomes 8-14

probe: chromosomes 15-Y

**Supplementary Table 1.** Aneuploidy in post-irradiation thymocytes and thymic lymphomas.

| Time after irradiation | No. of thymocytes (mice) examined | % aneuploid cells | No. of cells with different chromosome number |         |            |          |         |         |         |        |        |         |        |        |  |  |
|------------------------|-----------------------------------|-------------------|-----------------------------------------------|---------|------------|----------|---------|---------|---------|--------|--------|---------|--------|--------|--|--|
|                        |                                   |                   | 38 (%)                                        | 39 (%)  | 40 (%)     | 41 (%)   | 42 (%)  | 43 (%)  | 44 (%)  | 45 (%) | 46 (%) | 47 (%)  | 48 (%) | 49 (%) |  |  |
| Nonirradiated          | 200 (5)                           | 0.5               |                                               |         | 199 (99.5) | 1 (0.5)  |         |         |         |        |        |         |        |        |  |  |
| 0 week (2 h)           | 200 (5)                           | 3.0               | 1 (0.5)                                       | 3 (1.5) | 194 (97)   | 2 (1)    |         |         |         |        |        |         |        |        |  |  |
| 2 weeks                | 360 (9)                           | 14.4              |                                               | 9 (2.5) | 308 (86)   | 36 (10)  | 7 (2)   |         |         |        |        |         |        |        |  |  |
| 4 weeks                | 320 (8)                           | 34.1              | 1 (0.3)                                       | 2 (0.6) | 211 (66)   | 101 (32) | 4 (1)   | 1 (0.3) |         |        |        |         |        |        |  |  |
| 6 weeks                | 360 (9)                           | 34.7              | 3 (1)                                         | 8 (2)   | 235 (65)   | 112 (31) | 2 (0.6) |         |         |        |        |         |        |        |  |  |
| 8 weeks                | 600 (15)                          | 28.3              |                                               | 11 (2)  | 429 (72)   | 146 (24) | 12 (2)  | 1 (0.2) | 1 (0.2) |        |        |         |        |        |  |  |
| 10 weeks               | 280 (7)                           | 18.9              |                                               | 8 (3)   | 227 (81)   | 44 (16)  | 1 (0.4) |         |         |        |        |         |        |        |  |  |
| 13 weeks               | 320 (8)                           | 33.1              |                                               | 8 (3)   | 214 (67)   | 72 (23)  | 26 (8)  |         |         |        |        |         |        |        |  |  |
| Thymic lymphomas       | 560 (14)                          | 61.6              |                                               | 2 (0.4) | 215 (38)   | 286 (51) | 10 (2)  | 6 (1)   | 0 (0)   | 0 (0)  | 0 (0)  | 3 (0.5) | 24 (4) | 14 (3) |  |  |

**Supplementary Table 2.** Comparison of percent aneuploidy between thymocytes incubated with Colcemid for 3 h and thymocytes cultured with PMA, ionomycin, and 2-mercaptoethanol for 48 h.

| Mice <sup>a</sup> | Treatments of thymocytes | No. of metaphases examined | Aneuploid cells (%) | No. of metaphase cells with different chromosome number |    |    |    |
|-------------------|--------------------------|----------------------------|---------------------|---------------------------------------------------------|----|----|----|
|                   |                          |                            |                     | 39                                                      | 40 | 41 | 42 |
| 13w-6             | Colcemid, 3 h            | 40                         | 2 (5.0)             | 0                                                       | 38 | 2  | 0  |
|                   | PMA, 48 h                | 40                         | 2 (5.0)             | 0                                                       | 38 | 2  | 0  |
| 13w-7             | Colcemid, 3 h            | 40                         | 28 (70.0)           | 0                                                       | 12 | 26 | 2  |
|                   | PMA, 48 h                | 40                         | 27 (67.5)           | 1                                                       | 13 | 26 | 0  |
| 13w-9             | Colcemid, 3 h            | 40                         | 12 (30.0)           | 0                                                       | 28 | 12 | 0  |
|                   | PMA, 48 h                | 40                         | 15 (37.5)           | 0                                                       | 25 | 15 | 0  |
| 13w-10            | Colcemid, 3 h            | 40                         | 28 (70.0)           | 0                                                       | 12 | 3  | 25 |
|                   | PMA, 48 h                | 40                         | 27 (67.5)           | 0                                                       | 13 | 1  | 26 |
| 13w-11            | Colcemid, 3 h            | 40                         | 10 (25.0)           | 0                                                       | 30 | 10 | 0  |
|                   | PMA, 48 h                | 40                         | 13 (32.5)           | 3                                                       | 27 | 10 | 0  |
| 13w-12            | Colcemid, 3 h            | 40                         | 0 (0)               | 0                                                       | 40 | 0  | 0  |
|                   | PMA, 48 h                | 40                         | 1 (2.5)             | 1                                                       | 39 | 0  | 0  |
| 13w-14            | Colcemid, 3 h            | 40                         | 18 (45.0)           | 2                                                       | 22 | 16 | 0  |
|                   | PMA, 48 h                | 40                         | 22 (55.0)           | 0                                                       | 18 | 22 | 0  |
| 13w-15            | Colcemid, 3 h            | 40                         | 2 (5.0)             | 0                                                       | 38 | 2  | 0  |
|                   | PMA, 48 h                | 40                         | 1 (2.5)             | 0                                                       | 39 | 1  | 0  |

<sup>a</sup> Mice were irradiated at 1.8 Gy 4 times at 1-week intervals. Aneuploidy was examined in thymocytes 13 weeks after irradiation.

**Supplementary Table 3.** Chromosomal aberrations in descendants of irradiated thymocytes.

| Weeks after irradiation | No. of cells (mice) examined | No. of aberrant cells (%) | Mean No. of aberrations per cell | Chromatid-type |    |    |    | Chromosome-type |   |     |    |     |    |     |    |
|-------------------------|------------------------------|---------------------------|----------------------------------|----------------|----|----|----|-----------------|---|-----|----|-----|----|-----|----|
|                         |                              |                           |                                  | G              | B  | E  | SM | G               | B | Dic | R  | F   | DM | Pul | CF |
| Nonirradiated           | 1912 (10)                    | 126 (6.6)                 | 0.069                            | 103            | 12 | 7  | 0  | 2               | 0 | 0   | 0  | 0   | 1  | 1   | 6  |
| 0                       | 353 (5)                      | 145 (41.1)                | 0.808                            | 38             | 12 | 14 | 6  | 1               | 0 | 83  | 16 | 122 | 14 | 2   | 5  |
| 2                       | 1000 (5)                     | 102 (10.2)                | 0.113                            | 60             | 6  | 6  | 3  | 7               | 0 | 7   | 0  | 2   | 5  | 1   | 16 |
| 4                       | 1000 (5)                     | 86 (8.6)                  | 0.103                            | 40             | 16 | 7  | 4  | 3               | 1 | 5   | 0  | 8   | 9  | 2   | 8  |
| 6                       | 1717 (9)                     | 177 (10.3)                | 0.115                            | 125            | 10 | 14 | 7  | 8               | 1 | 1   | 0  | 4   | 1  | 0   | 27 |
| 8                       | 2937 (15)                    | 424 (14.4)                | 0.163                            | 342            | 40 | 19 | 7  | 21              | 3 | 4   | 2  | 9   | 4  | 2   | 27 |
| 10                      | 1400 (7)                     | 200 (14.3)                | 0.162                            | 158            | 22 | 19 | 0  | 3               | 1 | 4   | 0  | 6   | 1  | 1   | 12 |
| 13                      | 1101 (7)                     | 146 (13.3)                | 0.155                            | 123            | 12 | 5  | 3  | 3               | 0 | 2   | 2  | 11  | 4  | 2   | 4  |

Abbreviations: G, gap; B, break; E, exchange; Dic, dicentric; R, ring; F, fragment; DM, double minute; SM, single minute; Pul, pulverization; CF, centromeric fusion.

**Supplementary Table 4.** *Notch1* rearrangements in thymocyte clones after 4 consecutive irradiations of 1.8 Gy  $\gamma$ -rays.

| Weeks after irradiation | Mouse designation | Rearranged sequences in thymocyte clones <sup>a</sup> | Frequency            |
|-------------------------|-------------------|-------------------------------------------------------|----------------------|
| 0                       | 0w-1              | 4926·G·16675                                          | $7.6 \times 10^{-6}$ |
|                         | 0w-3              | 4921·GCTA·16674                                       | $7.6 \times 10^{-6}$ |
|                         | 0w-4              | 4921·GA·16674                                         | $1.3 \times 10^{-5}$ |
| 2                       | 2w-1              | 8186·CGCGAGGGG·16676                                  | $4.4 \times 10^{-6}$ |
| 4                       | 4w-9              | 4924·G·14786                                          | $7.6 \times 10^{-6}$ |
| 8                       | 8w-3              | 4923·GGTA·16674                                       | $1.3 \times 10^{-4}$ |
|                         |                   | 4923·AGGGG·16674                                      | $9.9 \times 10^{-5}$ |
|                         |                   | 8189·A·16674                                          | $4.4 \times 10^{-5}$ |
|                         | 8w-6              | 4926·GAGATAC·16676                                    | $1.1 \times 10^{-4}$ |
|                         |                   | 8189·AGGG·16675                                       | $1.2 \times 10^{-4}$ |
|                         |                   | 8190·CA·16674                                         | $4.4 \times 10^{-5}$ |
|                         | 8w-11             | 4925·GAGGAGT·16676                                    | $9.9 \times 10^{-6}$ |
|                         | 8w-13             | 8190·GAGGGAA·16675                                    | $7.6 \times 10^{-6}$ |
|                         |                   | 8186·CCC·16676                                        | $4.4 \times 10^{-6}$ |

<sup>a</sup> Rearranged sequences are expressed as breakpoint sequence ·inserted nucleotides· breakpoint sequence.



**Supplementary Table 5.** Examples of *TCRβ* rearrangements in thymocyte clones and resultant thymic lymphomas.

| Mice examined | <i>TCRβ</i> rearrangements in thymocyte clones | Thymic lymphomas examined                           | <i>TCRβ</i> rearrangements                                                                                                                                          |
|---------------|------------------------------------------------|-----------------------------------------------------|---------------------------------------------------------------------------------------------------------------------------------------------------------------------|
| 6w-8          | — <sup>a</sup>                                 | 6w-8-1<br>6w-8-2                                    | D2/J2.3<br>D2/J2.3                                                                                                                                                  |
|               |                                                |                                                     | D2/GCGGGTA/J2.1<br>D2/GCGGGTA/J2.1                                                                                                                                  |
| 8w-14         | D2/T/J2.3<br>D2/J2.5                           | 6w-8-3<br>8w-14-1<br>8w-14-2<br>8w-14-3<br>8w-14-4  | D2/J2.5<br>D2/J2.5<br>D2/J2.5<br>D2/T/J2.3<br>D2/J2.5                                                                                                               |
| 8w-16         | D1/J1.1<br>D2/T/J2.4                           | 8w-16-1<br>8w-16-2<br>8w-16-3<br>8w-16-4<br>8w-16-6 | D1/J1.1<br>D2/T/J2.4<br>D1/J1.1<br>D2/T/J2.4<br>D1/J1.1<br>D2/T/J2.4<br>D1/J1.1<br>D2/T/J2.4                                                                        |
| 8w-17         | D1/GA/J1.4<br>D2/CGCGGG/J2.2<br>D2/T/J2.7      | 8w-17-1<br>8w-17-2<br>8w-17-3<br>8w-17-4            | D1/GA/J1.4<br>D2/CGCGGG/J2.2<br>D2/T/J2.7<br>D1/GA/J1.4<br>D2/CGCGGG/J2.2<br>D2/T/J2.7<br>D1/GA/J1.4<br>D2/CGCGGG/J2.2<br>D2/T/J2.7<br>D1/GA/J1.4<br>D2/CGCGGG/J2.2 |
| 10w-3         | D1/GGAA/J1.4<br>D2/CGT/J2.3<br>D2/TACG/J2.5    | 10w-3-1<br>10w-3-2<br>10w-3-3<br>10w-3-4            | D2/TACG/J2.5<br>D2/TACG/J2.5<br>D2/TACG/J2.5<br>D2/TACG/J2.5                                                                                                        |
| 10w-7         | D1/CCCCTTCGGG/J1.3                             | 10w-7-1<br>10w-7-2<br>10w-7-3<br>10w-7-4            | D1/CCCCTTCGGG/J1.3<br>D1/CCCCTTCGGG/J1.3<br>D1/CCCCTTCGGG/J1.3<br>D1/CCCCTTCGGG/J1.3                                                                                |

<sup>a</sup> The minus symbol indicates the absence of clonal *TCRβ* rearrangements in thymocytes.

**Supplementary Table 6.** Rearranged sequences of *Notch1* gene in resultant thymic lymphomas.

| Thymic lymphomas | No. of <i>Notch1</i> rearrangements | Rearranged sequences <sup>a</sup>                                                                     |
|------------------|-------------------------------------|-------------------------------------------------------------------------------------------------------|
| 6w-7-1           | 2                                   | 4924·G·16675, ?                                                                                       |
| 6w-8-1           | 4                                   | 4925·16676, 8190·T·15582, 8190·16677, 8190·16681                                                      |
| 6w-8-2           | 1                                   | 4924·16676                                                                                            |
| 6w-8-3           | 3                                   | 4925·16676, 11179·15437, ?                                                                            |
| 6w-9-1           | 1                                   | 4926·AA·16675                                                                                         |
| 6w-9-2           | 1                                   | 4926·GGAGG·16675                                                                                      |
| 6w-9-3           | 5                                   | 4926·14781, 4926·GGAC·16675, 4926·GGGA·22145, 4926·GGGA·22147, 8073·TC·16006                          |
| 6w-9-4           | 0                                   |                                                                                                       |
| 6w-9-5           | 2                                   | 4923·GTTA·16674, 8073·C·16006                                                                         |
| 6w-10-2          | 1                                   | 4926·A·16674                                                                                          |
| 6w-10-3          | 1                                   | ? in juxtamembrane extracellular domain                                                               |
| 6w-10-4          | 1                                   | 4926·16674                                                                                            |
| 8w-13-1          | 0                                   |                                                                                                       |
| 8w-13-2          | 2                                   | 4926·TGGG·16676, 4926·GGACGGTATATG·16675                                                              |
| 8w-13-3          | 1                                   | 4926·GGGGGG·16676                                                                                     |
| 8w-14-1          | 1                                   | ?                                                                                                     |
| 8w-14-2          | 2                                   | 4926·GTG·16676, ?                                                                                     |
| 8w-14-3          | 1                                   | 4926·TGG·16674                                                                                        |
| 8w-14-4          | 1                                   | 4923·T·16674                                                                                          |
| 8w-16-1          | 1                                   | ? in juxtamembrane extracellular domain                                                               |
| 8w-16-2          | 0                                   |                                                                                                       |
| 8w-16-3          | 1                                   | 4923·A·16674                                                                                          |
| 8w-16-4          | 1                                   | ? in juxtamembrane extracellular domain                                                               |
| 8w-16-6          | 0                                   |                                                                                                       |
| 8w-17-1          | 5                                   | 4923·GTTTTA·22147, 4923·GTTTTA·22149, 4926·GTG·16676, 4925·GCG·16677, 8185·TG·16676                   |
| 8w-17-2          | 7                                   | 4926·A·16674, 4925·AAA·22146, 4926·GTT·22146, 8185·GATCTCT·15809, 8187·CTGA·16674, 8188·CCTA·16674, ? |
| 8w-17-3          | 5                                   | 4926·GGGCAG·16676, 4926·GCC·22149, 8190·T·16009, 8190·GGG·16676, ?                                    |
| 8w-17-4          | 1                                   | 4924·GGGAG·16675                                                                                      |
| 10w-1-1          | 1                                   | 4923·GCCGCCAG·16675                                                                                   |
| 10w-1-2          | 2                                   | 4921·CCCCCTG·16675, 8190·ATTTTTGCATG·16676                                                            |
| 10w-1-4          | 2                                   | 4926·TAGCTTT·16678, ?                                                                                 |
| 10w-1-5          | 2                                   | 4926·GGGAT·16676, ?                                                                                   |
| 10w-3-1          | 2                                   | ?, ?                                                                                                  |
| 10w-3-2          | 2                                   | 4921·CTATAA·16677, ?                                                                                  |
| 10w-3-3          | 3                                   | 4925·16677, 8187·GTAAAAG·16674, ?                                                                     |
| 10w-3-4          | 1                                   | 4926·AGGTA·16674                                                                                      |
| 10w-4-1          | 2                                   | 4922·TA·16674, ?                                                                                      |
| 10w-7-1          | 1                                   | ?                                                                                                     |
| 10w-7-2          | 1                                   | 4926·TGGGGATAGG·16676                                                                                 |
| 10w-7-3          | 0                                   |                                                                                                       |
| 10w-7-4          | 0                                   |                                                                                                       |

<sup>a</sup> Rearranged sequences are shown as breakpoint sequence-inserted nucleotides-breakpoint sequence. The question marks indicate an unknown sequence.
